# Supplementary material for: Tau phosphorylation regulates the interaction between BIN1’s SH3 domain and Tau’s proline-rich domain
Source: Springer Nature journal article supplement (doi:10.1186/s40478-015-0237-8), 2015-09-23
Supplement: MOESM2 [file 25665790]

**Antibodies used and their respective dilutions.**

| Antibody          | epitope     | Western Blot dilution | Immunofluorescence Dilution | Reference                |
|-------------------|-------------|-----------------------|-----------------------------|--------------------------|
| AT270             | pT181       | 1/1,000               |                             | Pierce antibodies MN1050 |
| pS199             | pS199       | 1/1,000               |                             | LifeTechnologies 44-734G |
| Tau-1             | pS199-S208  |                       |                             | Millipore MAB3420        |
| CP13              | pS202       | 1/1,000               | 1/200                       | Gift of Peter Davies     |
| AT8               | pS202/pT205 | 1/1,000               |                             | Pierce antibodies MN1020 |
| AT180             | pT231       | 1/1,000               |                             | Pierce antibodies MN1040 |
| RZ3               | pT231       | 1/1,000               | 1/200                       | Gift of Peter Davies     |
| PHF-1             | pS396/pS404 | 1/1,000               | 1/200                       | Gift of Peter Davies     |
| Tau               | Total tau   |                       | 1/400                       | Dako Cytomation A0024    |
| Tau-5             |             | 1/1,000               |                             | LifeTechnologies AHB0042 |
| BIN1 99D          | MycBD       | 1/1,000               | 1/200                       | Millipore 05-449         |
| BIN1 Anti SH3     | SH3         | 1/1,000               | 1/200                       | Abcam ab27796            |
| $\alpha$ -tubulin |             | 1/1,000               |                             | Abcam ab24622            |
| PSD95             |             |                       | 1/500                       | SYSY 124012              |
| Synaptophysin     |             |                       | 1/500                       | SYSY 101004              |
| Clathrin          |             |                       | 1/400                       | Santa-cruz sc-6579       |
