# Supplementary material for: Tau phosphorylation regulates the interaction between BIN1’s SH3 domain and Tau’s proline-rich domain
Source: Springer Nature journal article supplement (doi:10.1186/s40478-015-0237-8), 2015-09-23

# Additional file 10

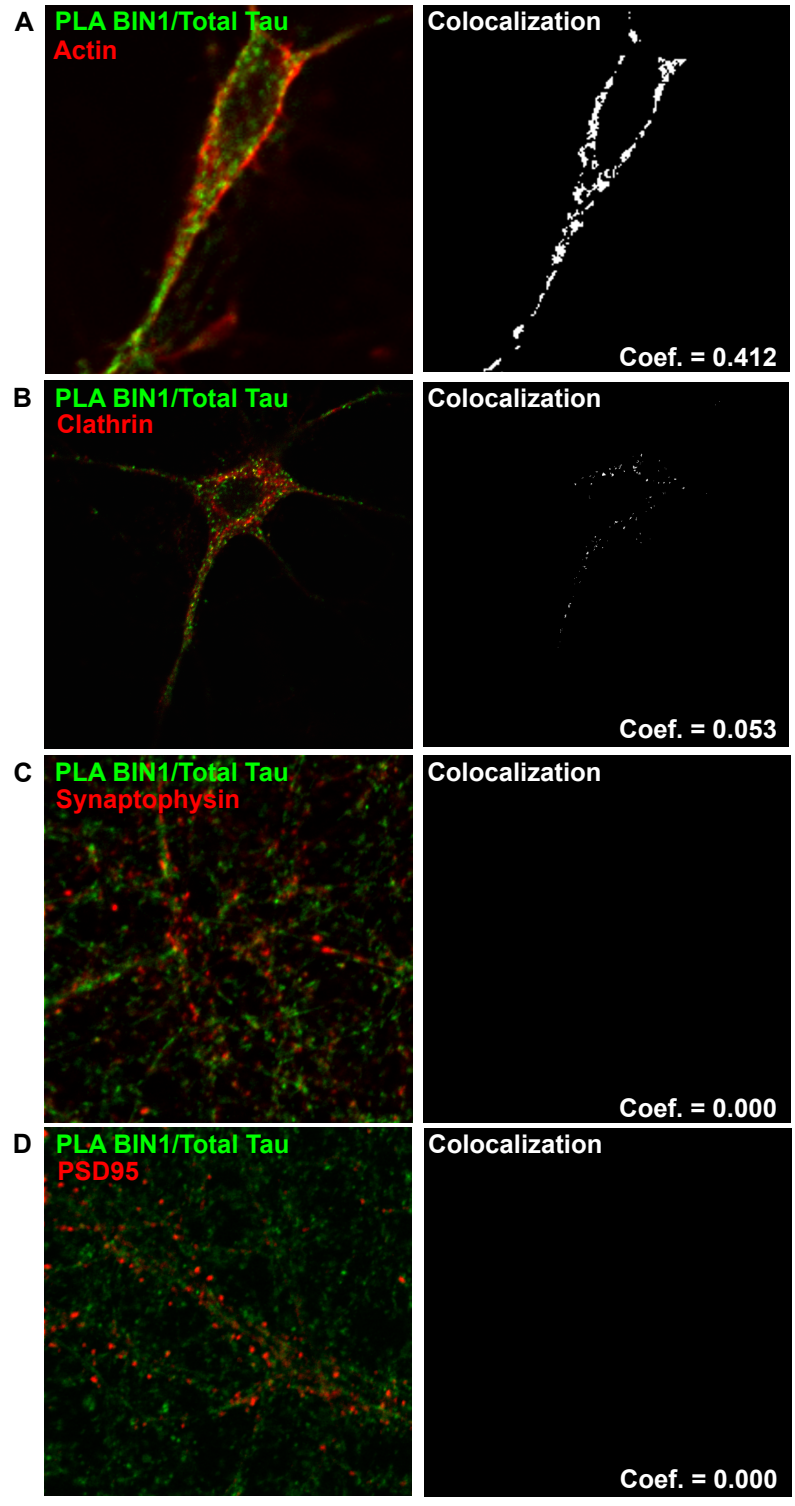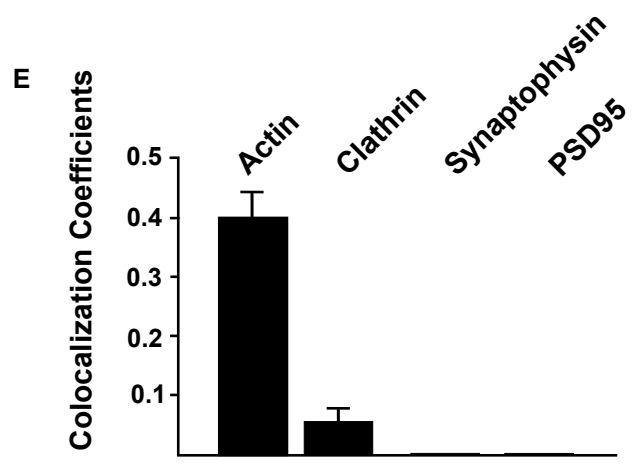

Supplement: MOESM10 [file 25665790]
